# Supplementary material for: Phenotype and Distribution of Immature Neurons in the Human Cerebral Cortex Layer II
Source: PubMed Central journal article supplement (PMC9027810; doi:10.3389/fnana.2022.851432), 2022-04-08
Supplement: Data_Sheet_1.pdf [file Data_Sheet_1.pdf]

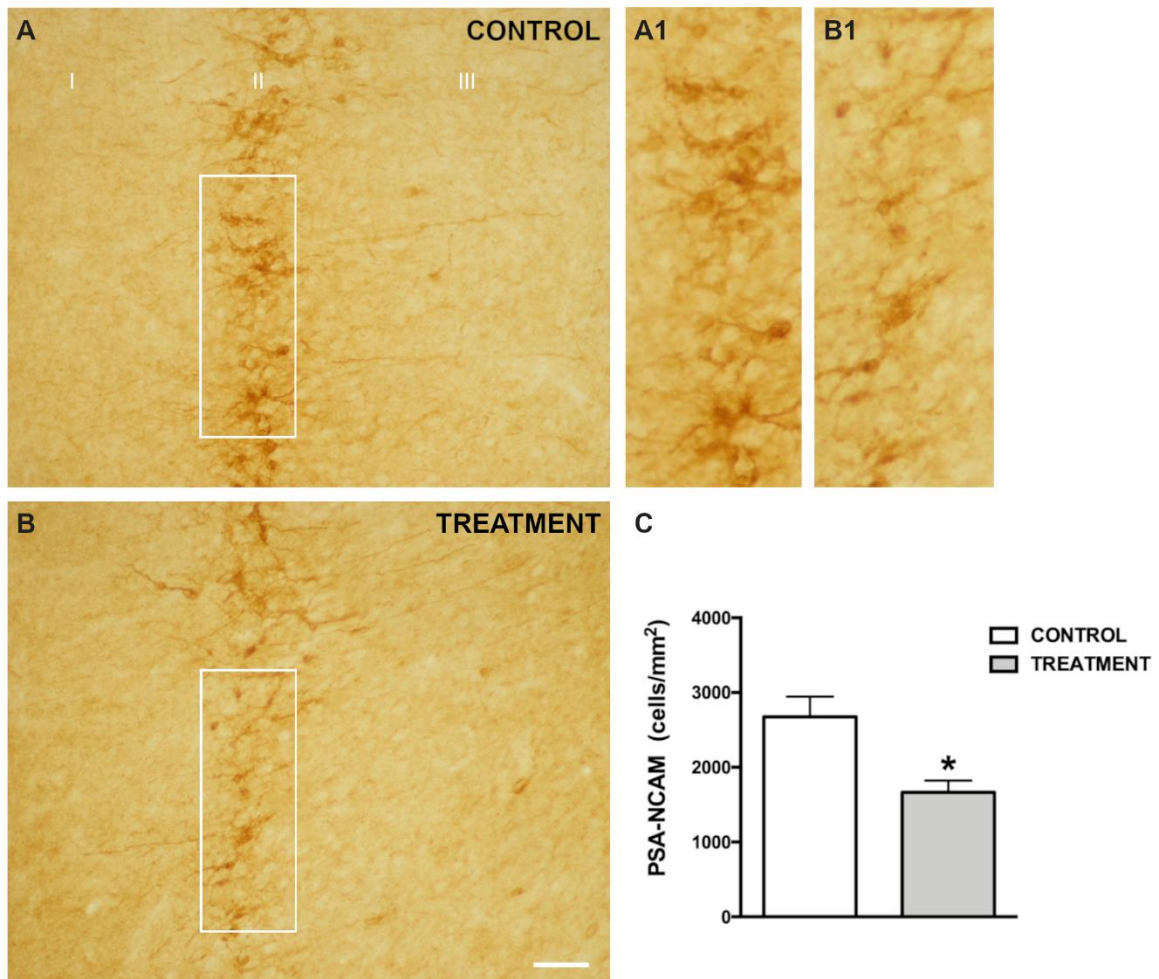

**Fig. S1. Density of PSA-NCAM expressing cells in the piriform cortex layer II in the lithium-pilocarpine epilepsy model in rats. (A & B)** Microphotographs showing PSA-NCAM immunoreactive cells in control (A) and after treatment with pilocarpine (B). **(A'-B')** Higher magnification of the squared areas in A & B. **(C)** Graph representing changes in the density of PSA-NCAM expressing cells. Asterisks in treatment bars indicate statistically significant differences from control groups after unpaired Student's t-test;  $p < 0.05$  (\*). Scale bars: 200  $\mu\text{m}$  for (A & B); 100  $\mu\text{m}$  for (A1 & B1).

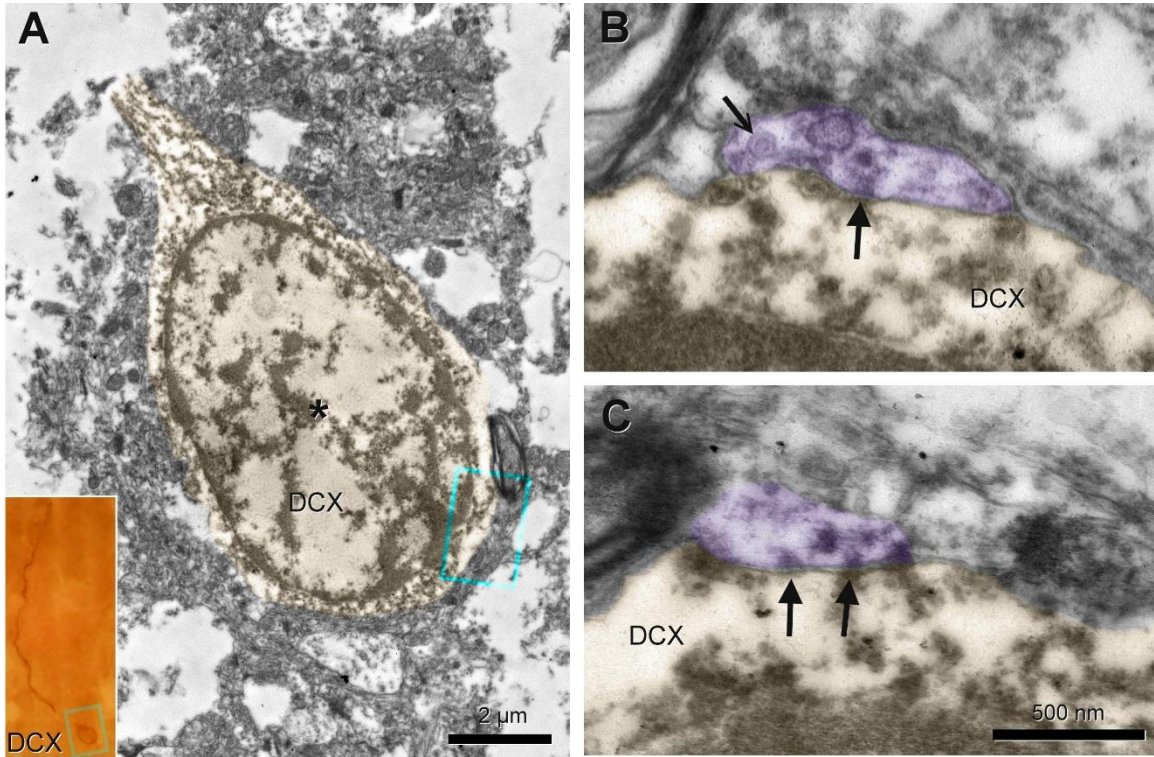

**Fig. S2. Ultrastructure of type II DCX immunoreactive neurons in the human cerebral cortex layer II.** (A) Field survey of a neuron (asterisk) identified on light microscopy (inset). The cell presents little cytoplasm and an ovoid nucleus with heterochromatin; organelles are scarce. (B & C) Two examples of asymmetrical synaptic contacts on the cell. Although the contacts are small (arrows), the postsynaptic density and the synaptic cleft are visible. On the presynaptic side, the clear vesicles cannot be accurately discriminated since membrane preservation is not optimal in PFA fixed tissue, but dense core vesicles are better preserved (barbed arrow). Scale bars: 2 μm for A, 500nm for B & C. False colors are used to identify the cell and the boutons. All images in this figure were from neurosurgical samples.

**Table S1. Primary and secondary antibodies used in the study**

| <i>Primary antibodies</i> | <i>Anti</i> | <i>Host</i> | <i>Isotype</i>    | <i>Dilution</i> | <i>Catalog number</i> | <i>Company</i> |
|---------------------------|-------------|-------------|-------------------|-----------------|-----------------------|----------------|
|                           | Ank-G       | Mouse       | IgG <sub>1</sub>  | 1:200           | SC12719               | Santa Cruz     |
|                           | CTIP2       | Rat         | IgG <sub>2A</sub> | 1:1000          | Ab18465               | Abcam          |
|                           | CUX1        | Mouse       | IgG <sub>1</sub>  | 1:100           | Ab115854              | Abcam          |
|                           | DCX         | Rabbit      | IgG               | 1:500           | 4604S                 | Cell signaling |
|                           | DCX         | Mouse       | IgG <sub>1</sub>  | 1:500           | SC27139               | Santa Cruz     |
|                           | GAD67       | Mouse       | IgG <sub>2A</sub> | 1:1000          | MAB5406               | Sigma-Aldrich  |
|                           | GFAP        | Chicken     | IgG               | 1:4000          | Ab7260                | Abcam          |
|                           | IBA1        | Rabbit      | IgG               | 1:4000          | Ab178846              | Abcam          |
|                           | NeuN        | Mouse       | IgG <sub>1</sub>  | 1:1000          | MAB377                | Sigma-Aldrich  |
|                           | PSA-NCAM    | Mouse       | IgM               | 1:1400          | AbC0019               | Abcys          |
|                           | PSA-NCAM    | Mouse       | IgM               | 1:1400          | MAB5324               | Sigma-Aldrich  |
|                           | TBR1        | Rabbit      | IgG               | 1:1000          | Ab31940               | Abcam          |
|                           | VGLUT1      | Guinea pig  | IgG               | 1:1000          | AB5905                | Sigma-Aldrich  |
|                           | GluN1       | Rabbit      | IgG               | 1:400           | AGC-001               | Alomone        |

| <i>Secondary antibodies</i> | <i>Anti</i>             | <i>Host</i> | <i>Conjugate</i> | <i>Dilution</i> | <i>Catalog number</i> | <i>Company</i>         |
|-----------------------------|-------------------------|-------------|------------------|-----------------|-----------------------|------------------------|
|                             | Chicken-IgY             | Goat        | AF555            | 1:400           | A32932                | ThermoFisher           |
|                             | Chicken-IgY             | Goat        | CF488            | 1:400           | 20166                 | Biotium                |
|                             | Guinea Pig-IgG          | Donkey      | CF555            | 1:400           | 20276                 | Biotium                |
|                             | Mouse-IgG <sub>1</sub>  | Goat        | CF633            | 1:400           | 20250                 | Biotium                |
|                             | Mouse-IgG <sub>1</sub>  | Goat        | AF555            | 1:400           | A21127                | ThermoFisher           |
|                             | Mouse-IgG <sub>2A</sub> | Goat        | AF555            | 1:400           | A21137                | ThermoFisher           |
|                             | Mouse-IgM               | Goat        | AF488            | 1:400           | A21042                | ThermoFisher           |
|                             | Mouse-IgM               | Goat        | Biotin           | 1:400           | A2338587              | Jackson ImmunoResearch |
|                             | Rabbit-IgG              | Goat        | AF555            | 1:400           | A32732                | ThermoFisher           |
|                             | Rabbit-IgG              | Donkey      | CF555            | 1:400           | 20038                 | Biotium                |
|                             | Rat-IgG <sub>2A</sub>   | Goat        | CF647            | 1:400           | 20843                 | Biotium                |
